# Supplementary material
Source: PubMed Central journal article supplement (PMC3837985)
Supplement: IAI.00998-13_zii999090411so1.pdf [file IAI.00998-13_zii999090411so1.pdf]

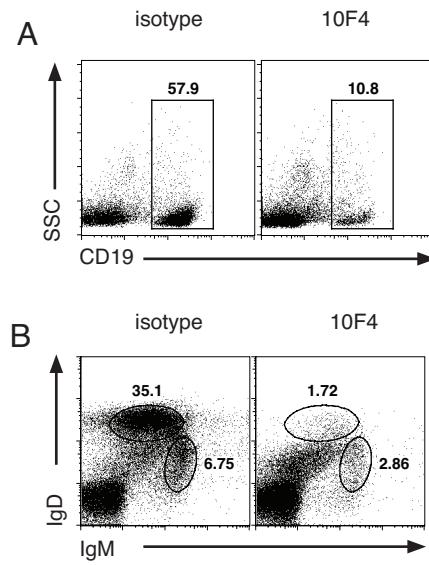

***SUPPLEMENTAL FIGURE 1. BAFF blockade effectively depleted mature B cells.***

(A) Mice were administered an anti-BAFF Ab (10F4), or an irrelevant isotype-matched Ab, and the frequency of CD19-positive spleen cells was determined 10 days later. SSC: side scatter. (B) Splenocytes were analyzed for the expression of IgD and IgM.

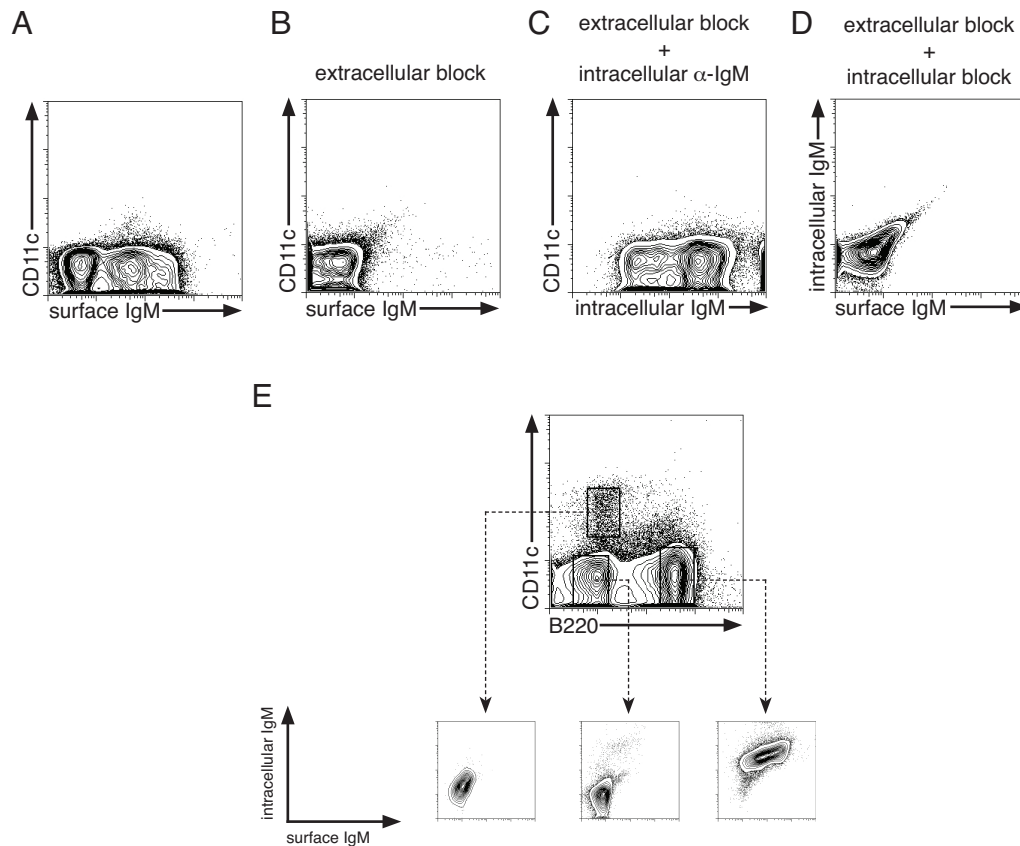

**SUPPLEMENTAL FIGURE 2. Intracellular IgM was detected within B cells.**

(A) B220<sup>+</sup> spleen cells from uninfected mice were analyzed for expression of surface IgM and CD11c. (B) Surface IgM was blocked using an excess of unlabeled polyclonal goat anti-mouse IgM (extracellular block); cells were analyzed for expression of surface IgM and CD11c. (C) Surface IgM was blocked as for panel B (extracellular block), followed by fixation and permeabilization. Cells were analyzed for expression of intracellular IgM. (D) Surface IgM was blocked as for panel B (extracellular block), followed by incubation with FITC-conjugated anti-IgM, fixation, and permeabilization. Cells were incubated with an excess of unlabeled goat anti-mouse IgM (intracellular block), and analyzed for the expression of intracellular IgM (PE-conjugated anti-IgM). (E) The indicated populations of spleen cells in the upper panel were analyzed for expression of surface IgM and intracellular IgM, shown in the lower panels. Intracellular IgM was only detected within the B220<sup>+</sup> population.
